# Supplementary material for: Environmental factors explain spawning day deviation from full moon in the scleractinian coral Acropora
Source: PubMed Central journal article supplement (PMC7013481; doi:10.1098/rsbl.2019.0760), 2020-01-22
Supplement: rsbl20190760supp1.pdf [file rsbl20190760supp1.pdf]

### **Supplementary figures:**

**Environmental factors explain spawning day deviation from full moon in the scleractinian coral *Acropora***  
Yusuke Sakai, Masayuki Hatta, Seishiro Furukawa, Masakado Kawata, Naoto Ueno, Shinichiro Maruyama

**Figure S1. A schematic diagram of data processing for statistical analyses.** Mean environmental parameters were calculated for each year and each reef, based on time ranges 1 to 4.

**Figure S2. Diagnostic plots of the final linear mixed model for time range (1).** The model includes spawning day deviation from the full moon as the response variable and mean sea surface temperature (SST) and wind speed as the explanatory variables. The difference in reef region was included as a random effect. (A) Normal quantile–quantile plots; (B) Distribution histograms of residuals; (C) Plot of residuals against predicted values; (D) Plot of predicted values against response variables.

**Figure S3. Diagnostic plots of the final linear mixed model for time range (2).** The model includes spawning day deviation from the full moon as the response variable and mean sea surface temperature (SST) and wind speed as the explanatory variables. Refer to the legend for Fig. S2.

**Figure S4. Diagnostic plots of the final linear mixed model for time range (3).** The model includes spawning day deviation from the full moon as the response variable and mean sea surface temperature (SST) as the explanatory variable. Refer to the legend for Fig. S2.

**Figure S5. Diagnostic plots of the final linear mixed model for time range (4).** The model includes spawning day deviation from full moon as the response variable and mean solar flux as the explanatory variable. Refer to the legend for Fig. S2.

**Figure S6. Histograms of spawning day deviation from the full moon for each of the seven examined reefs.**

**Figure S7. Summary of the typical seasonal changes in environmental parameters [sea surface temperature (SST), wind speed, and solar flux].** The vertical straight and undulating lines represent the spawning day deviation from the full moon and the daily mean values of environmental parameters of the years showing lowest (red) or highest (blue) deviation at each reef, respectively. The environmental data were plotted from -120 DAFM.

**Fig. S8. Annual fluctuations in sea surface temperature (SST) and solar flux in 2010 and 2011 in seven reef regions.** Lines show the daily means of SST and solar flux, which were standardized to Z-score values, respectively.

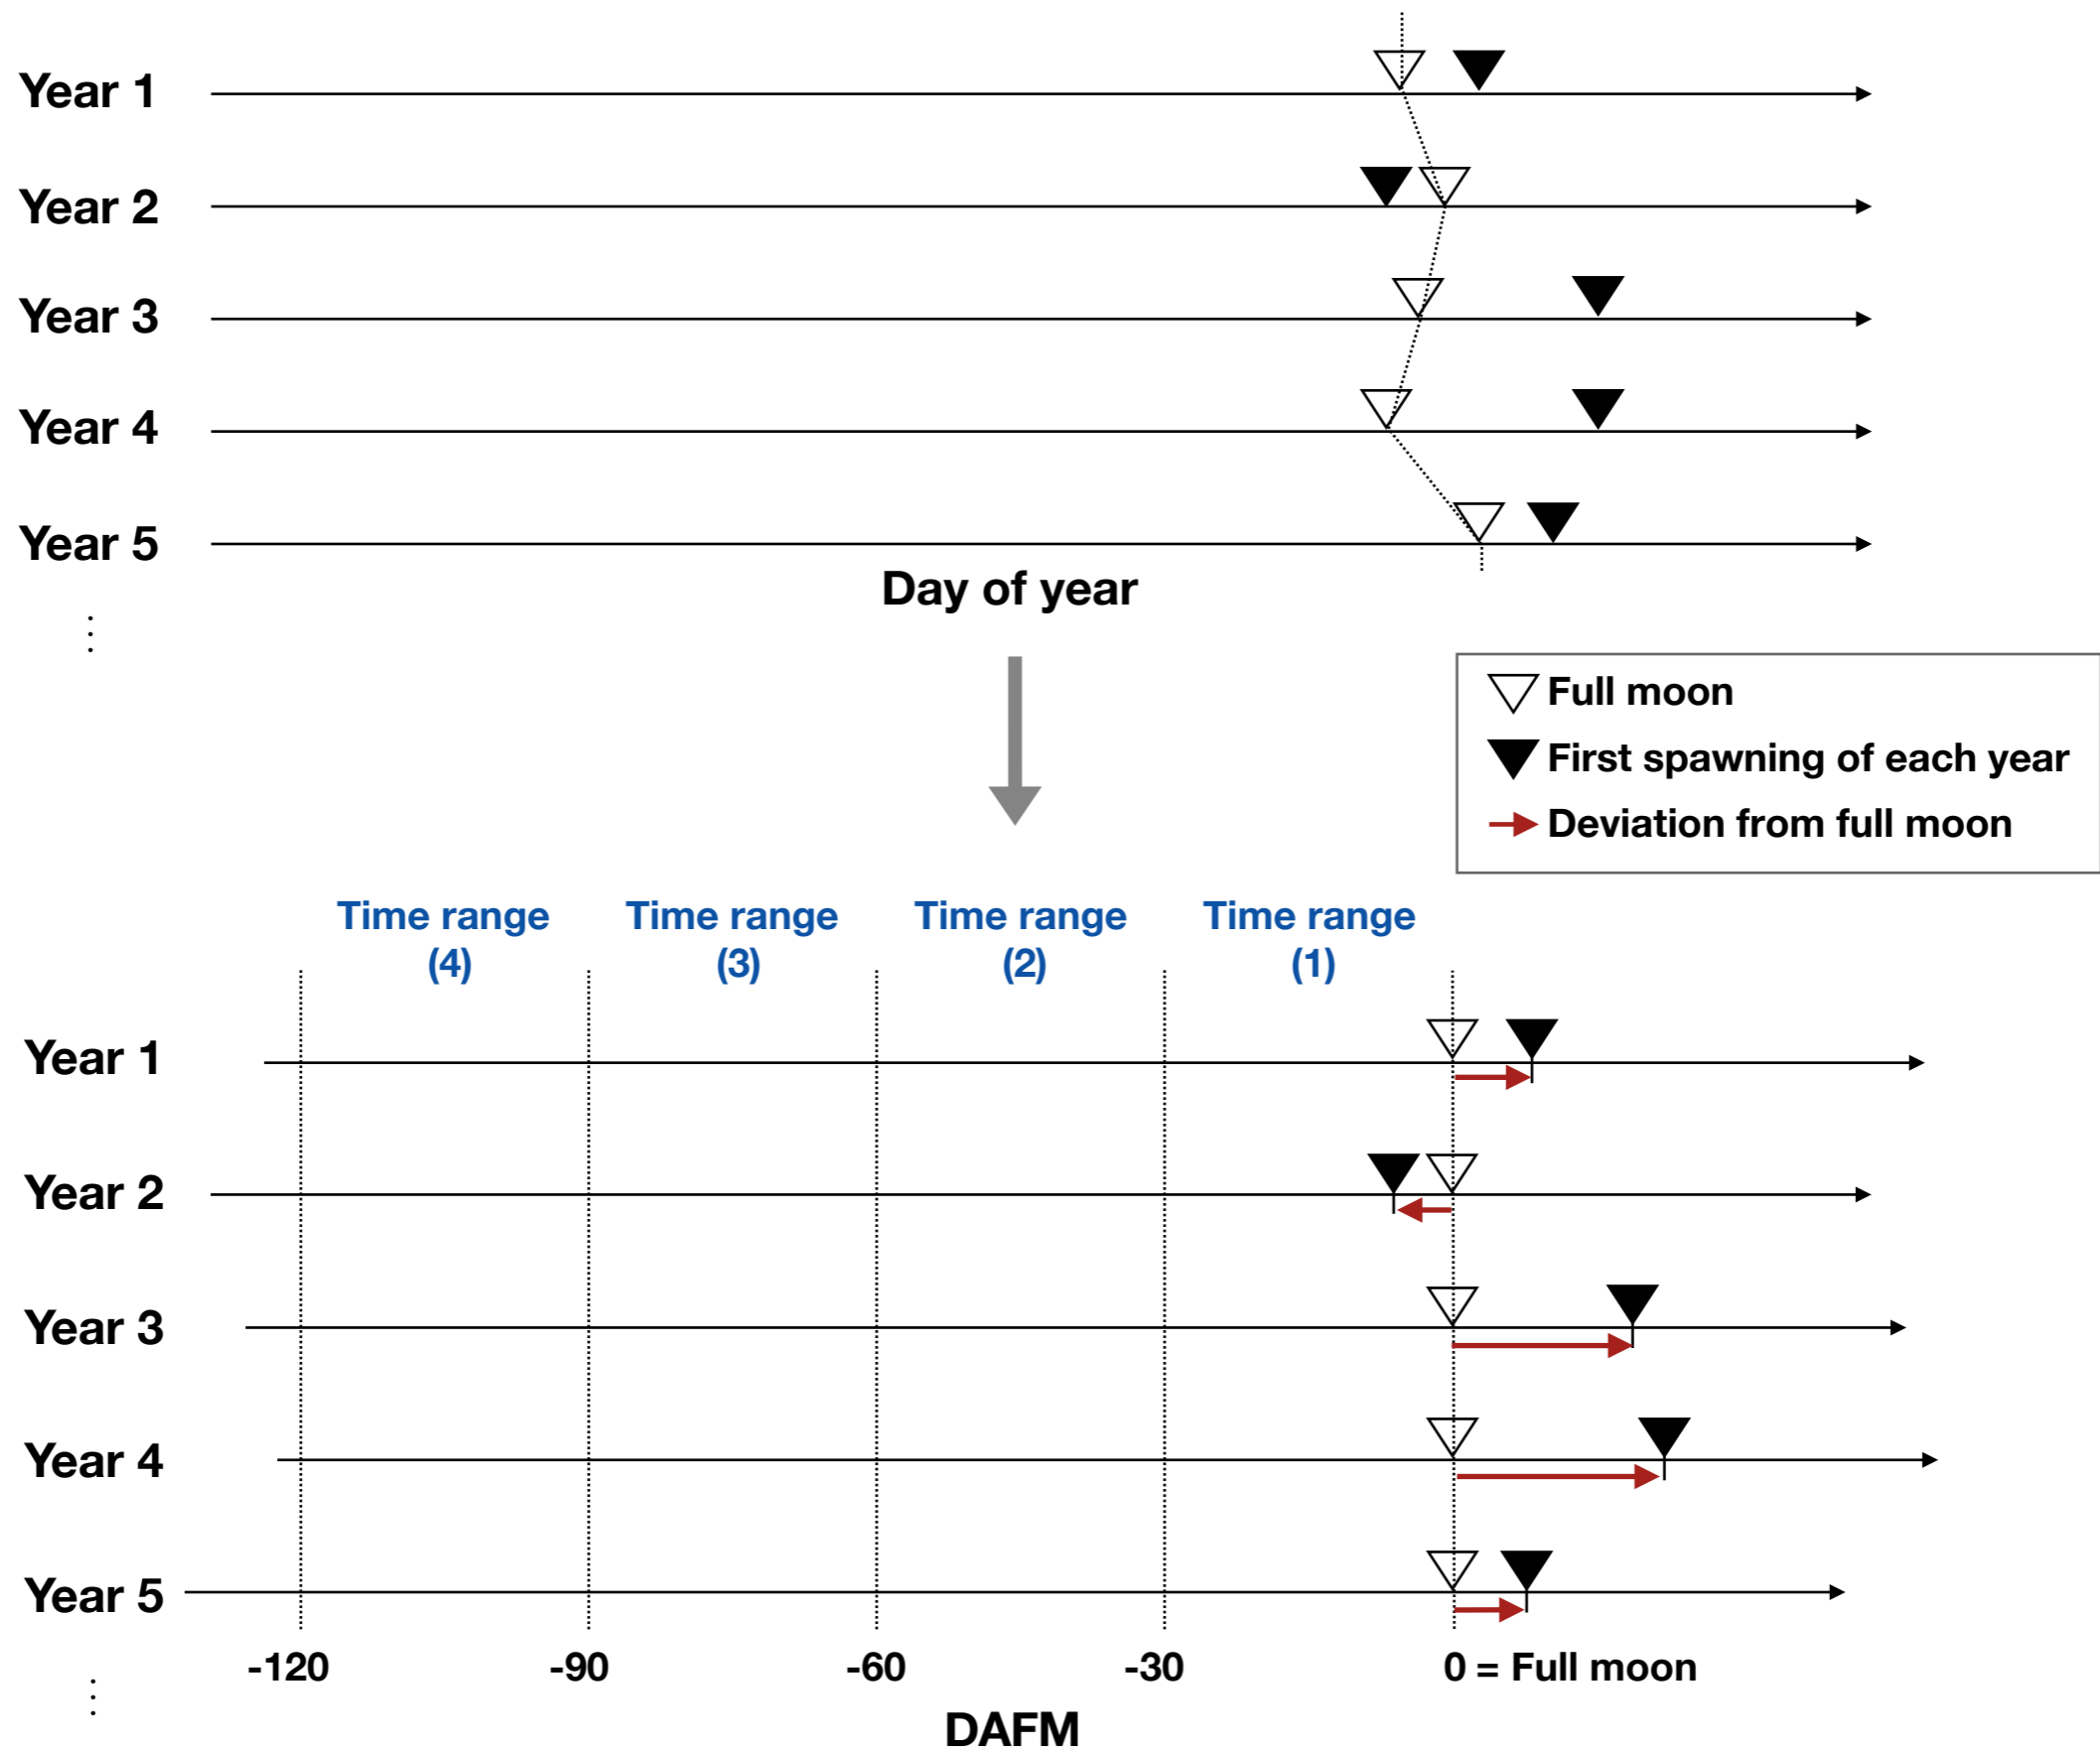

Figure S1

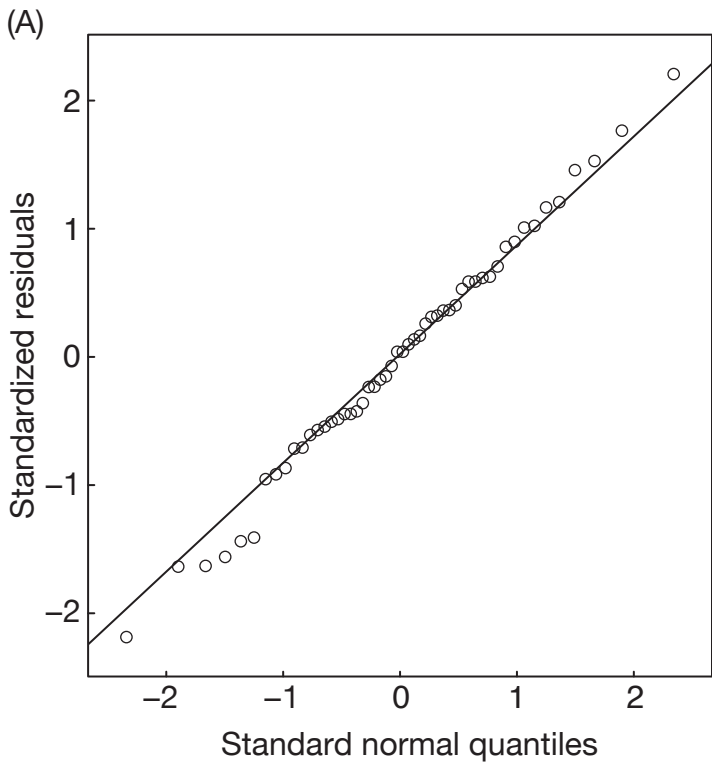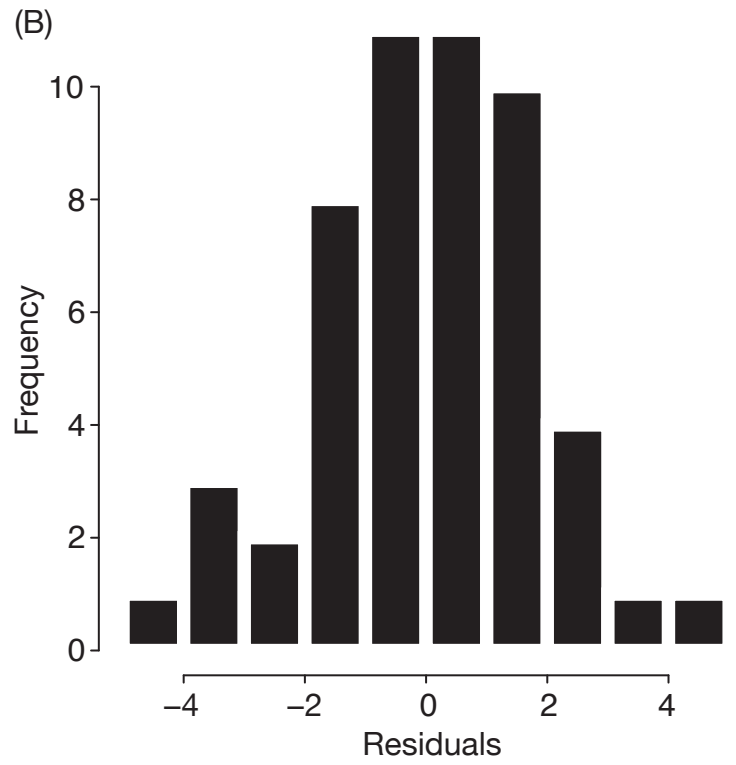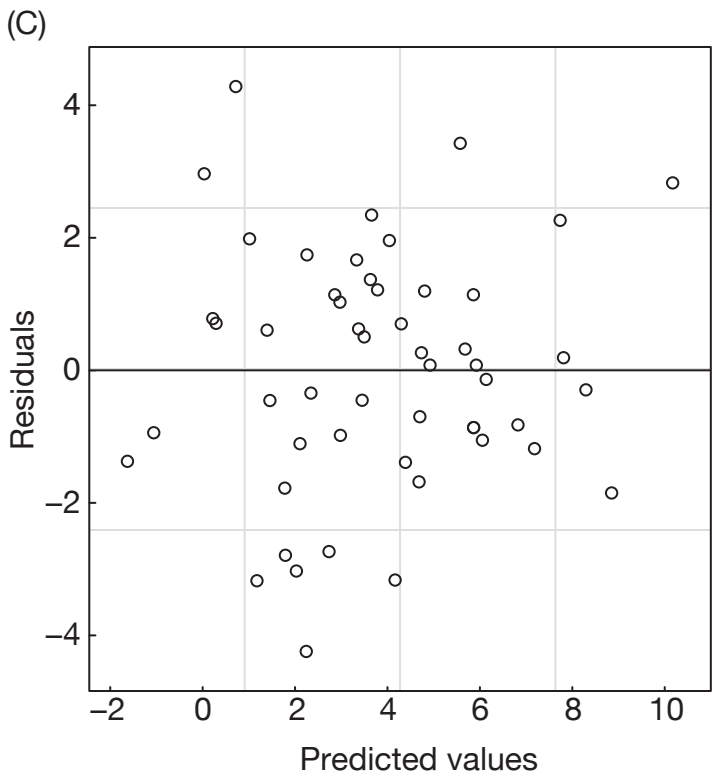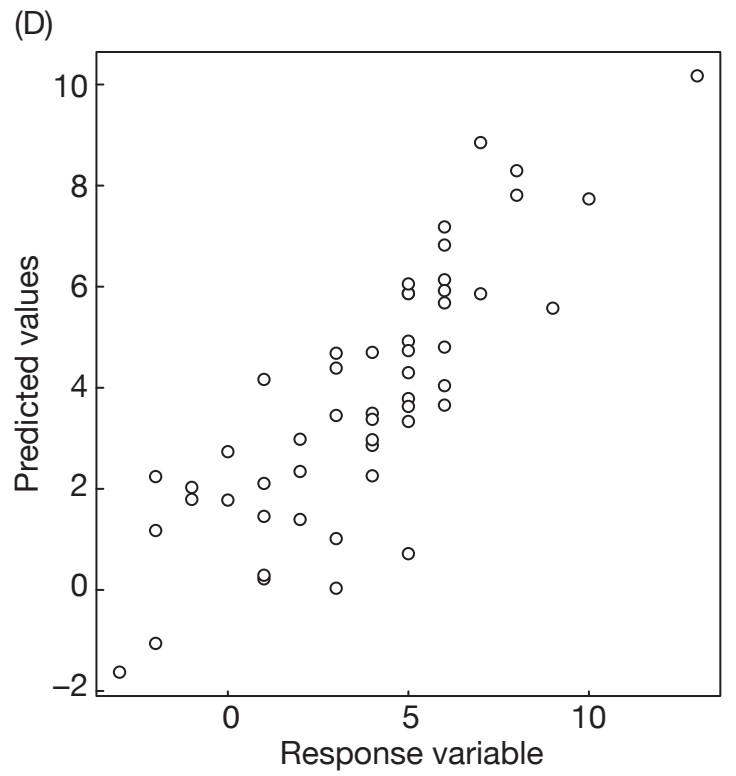

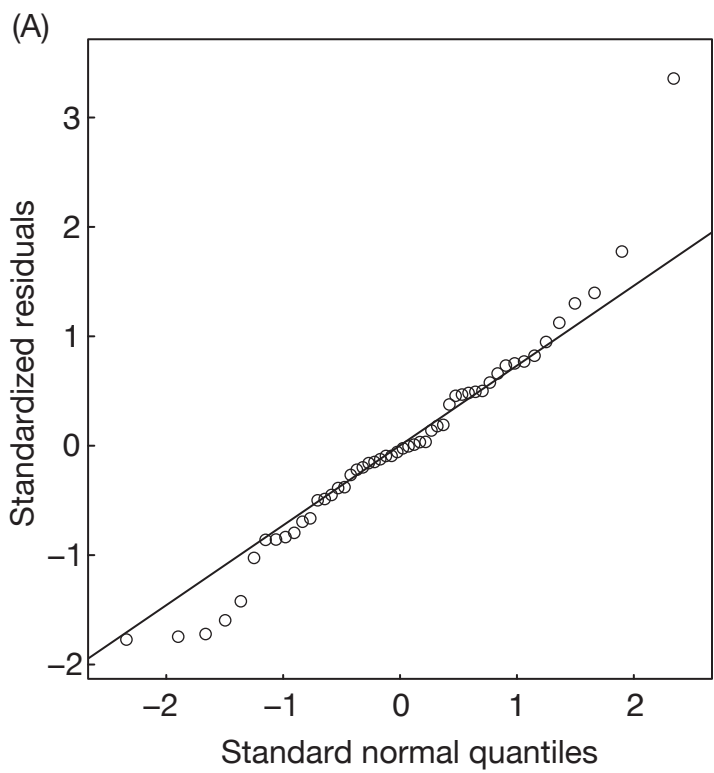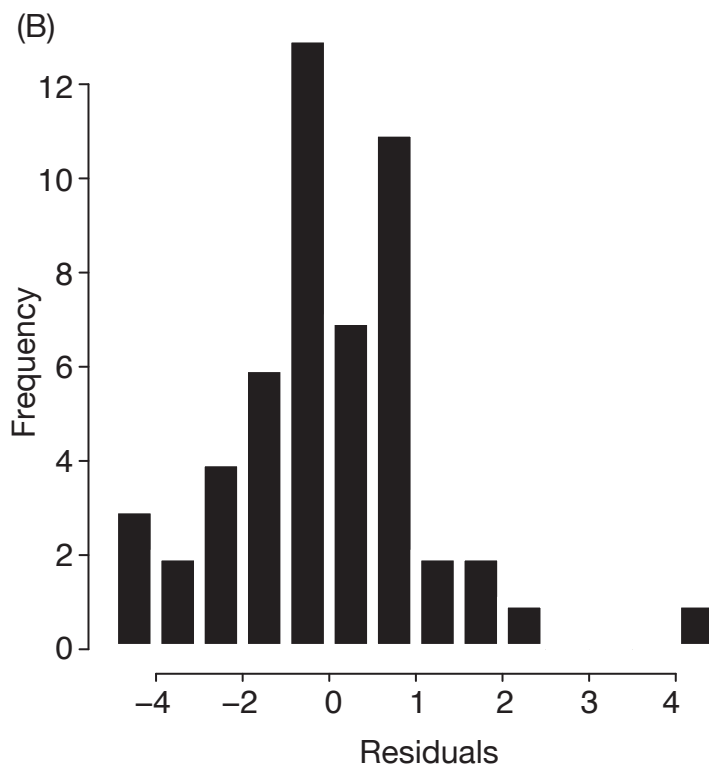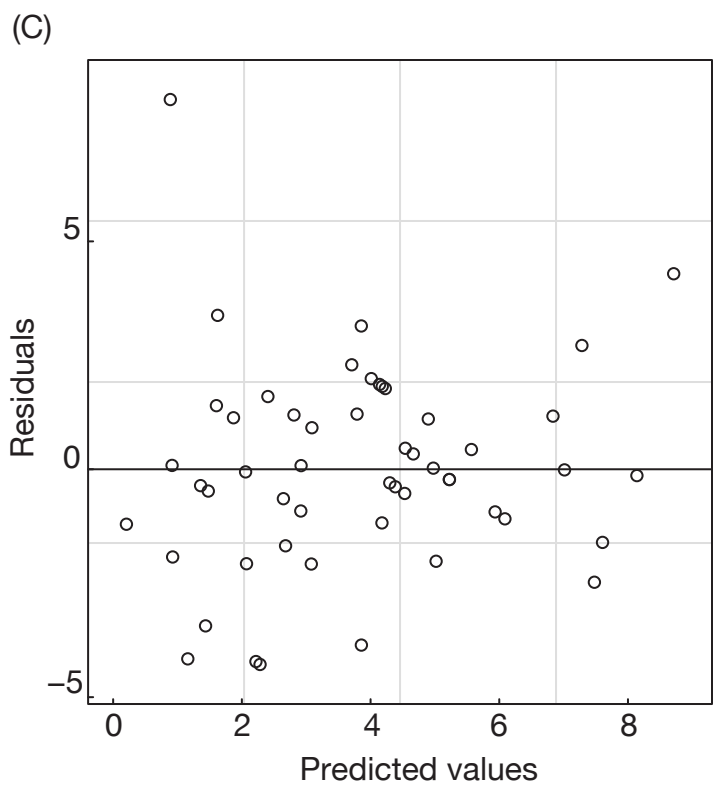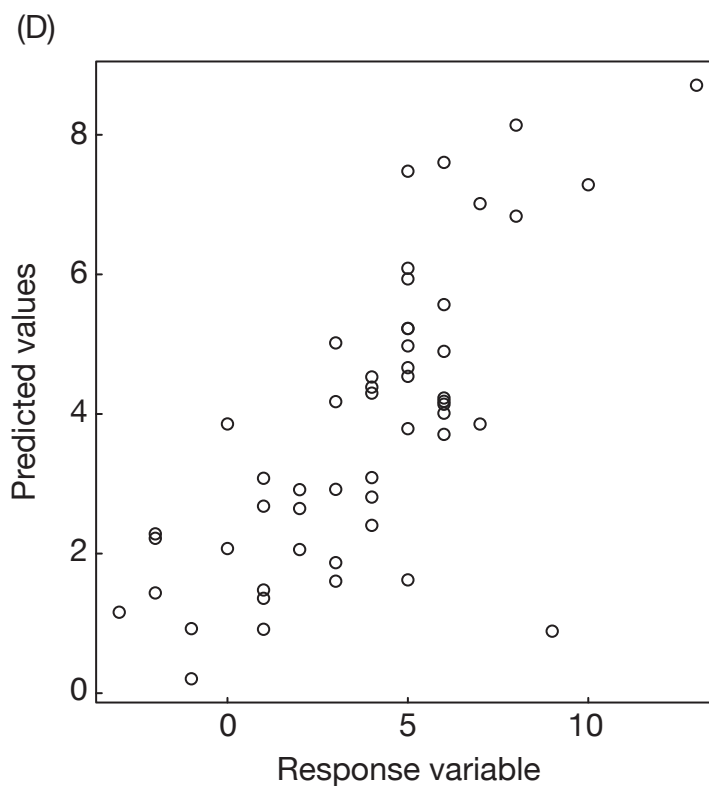

Figure S3

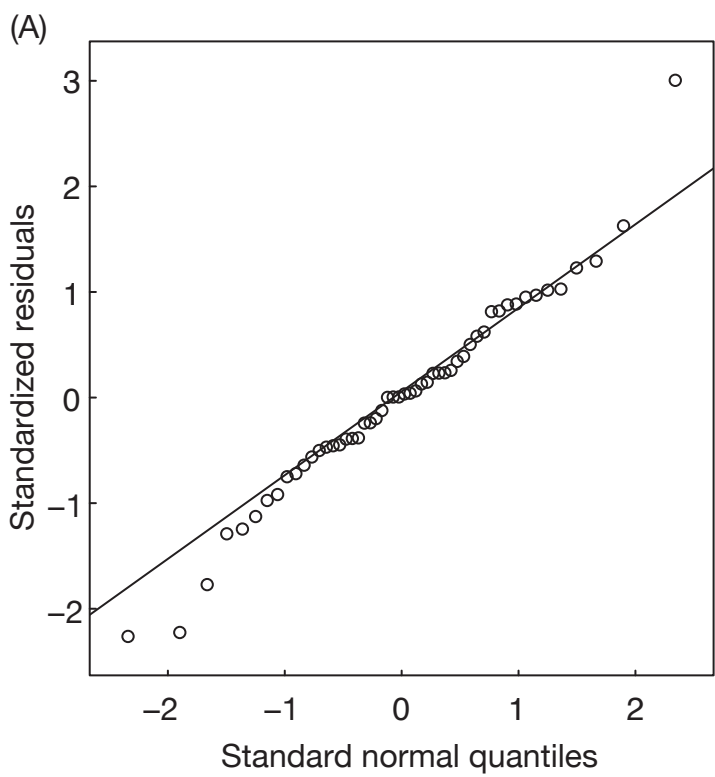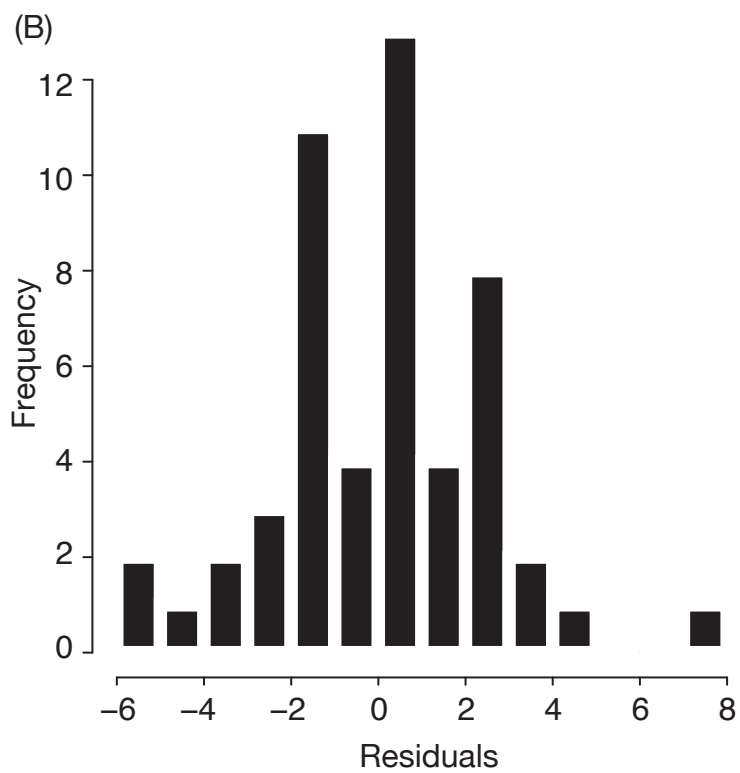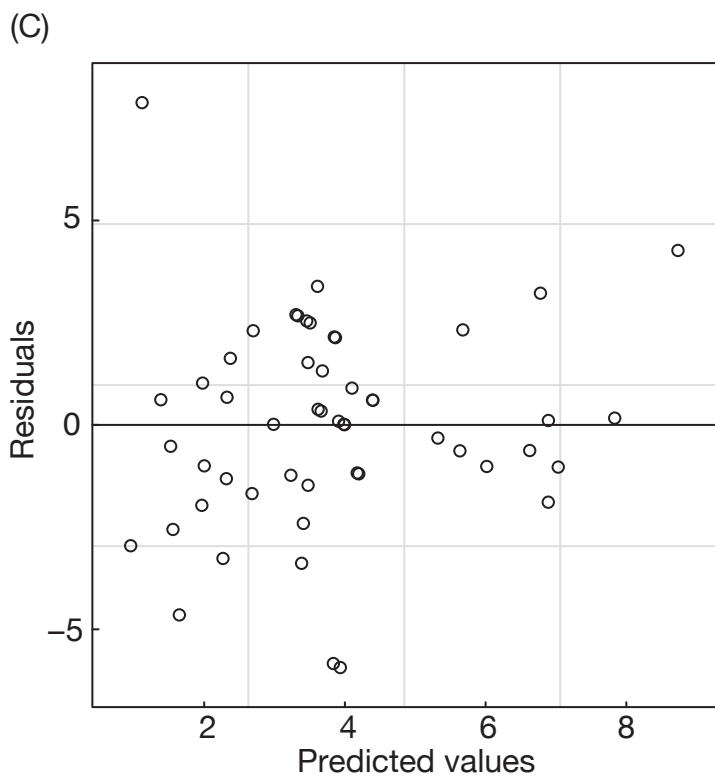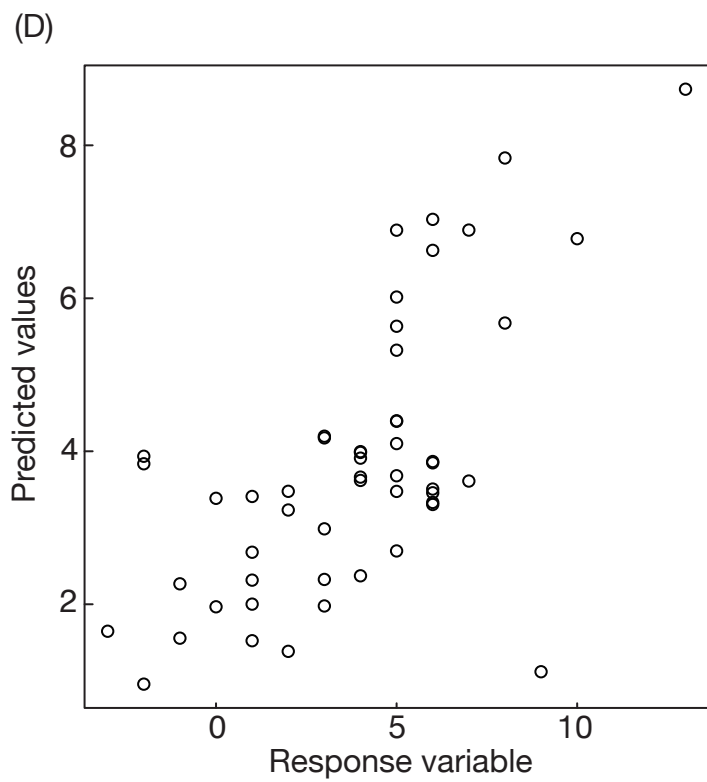

Figure S4

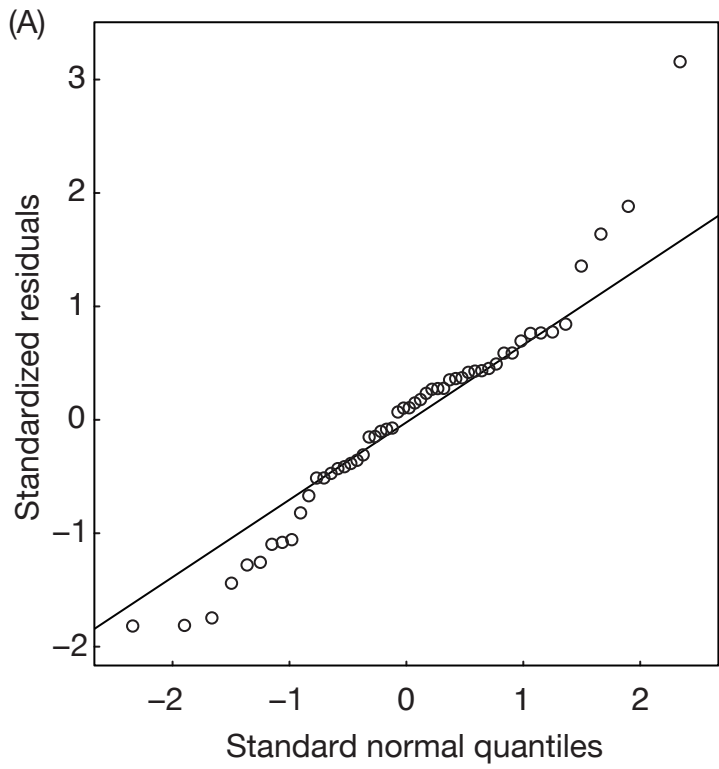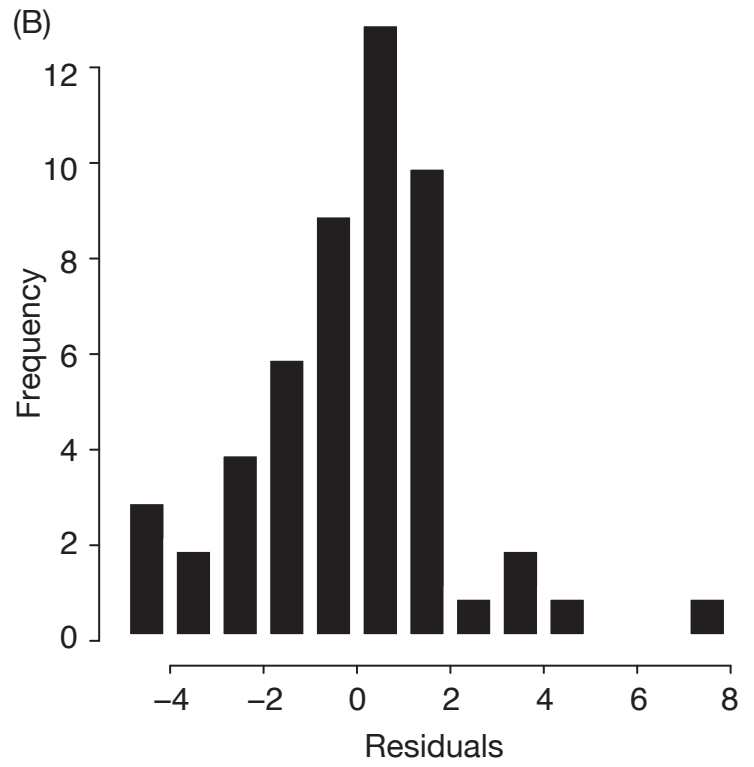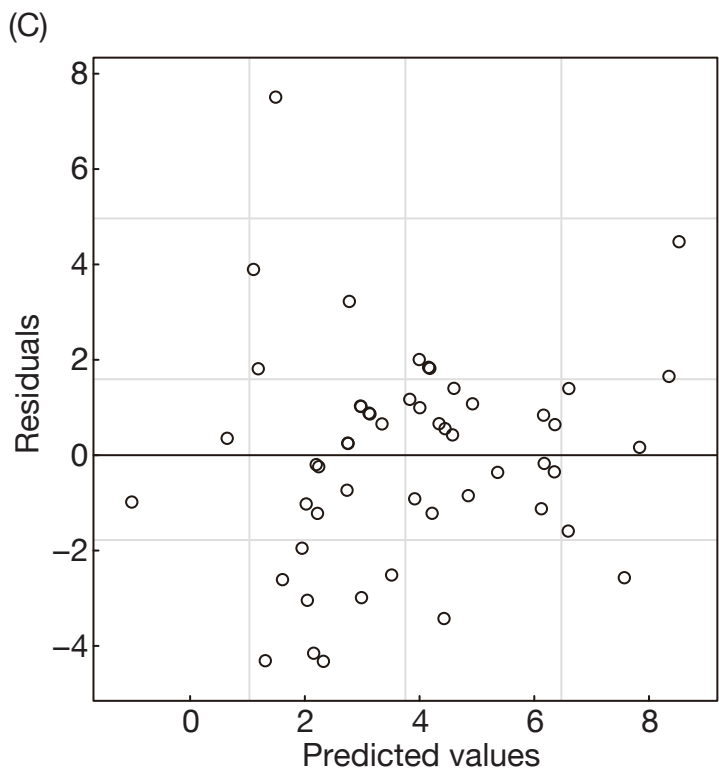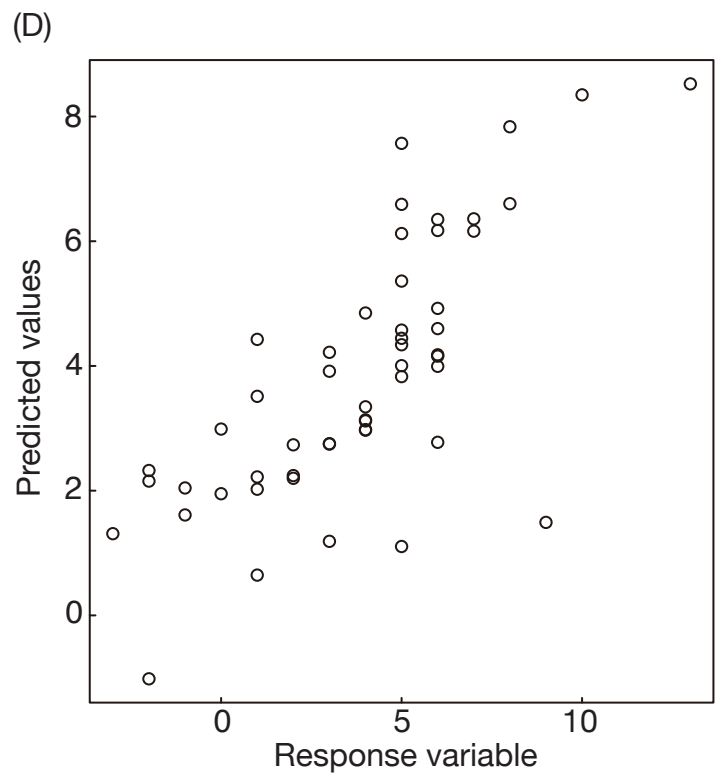

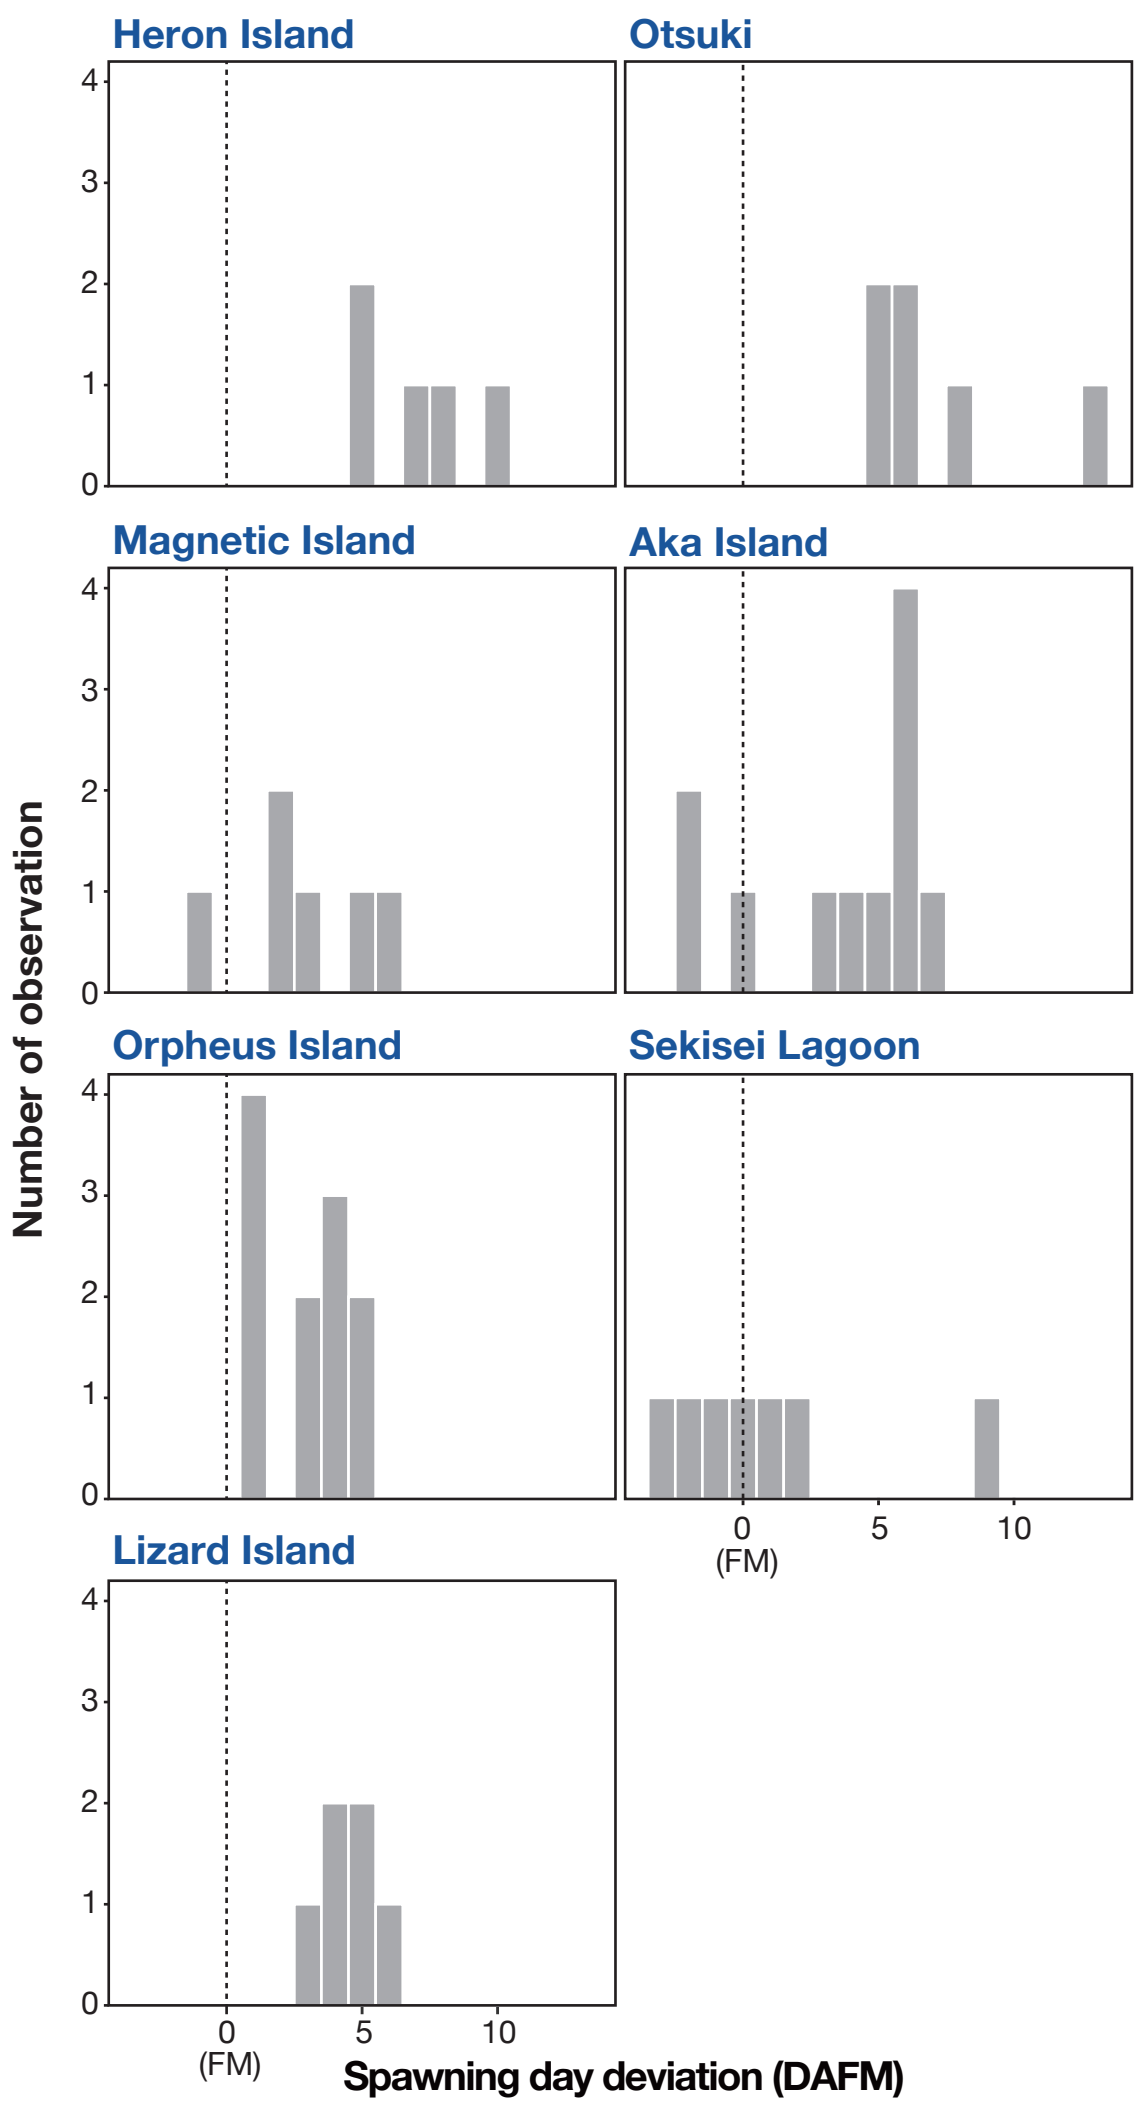

Figure S6

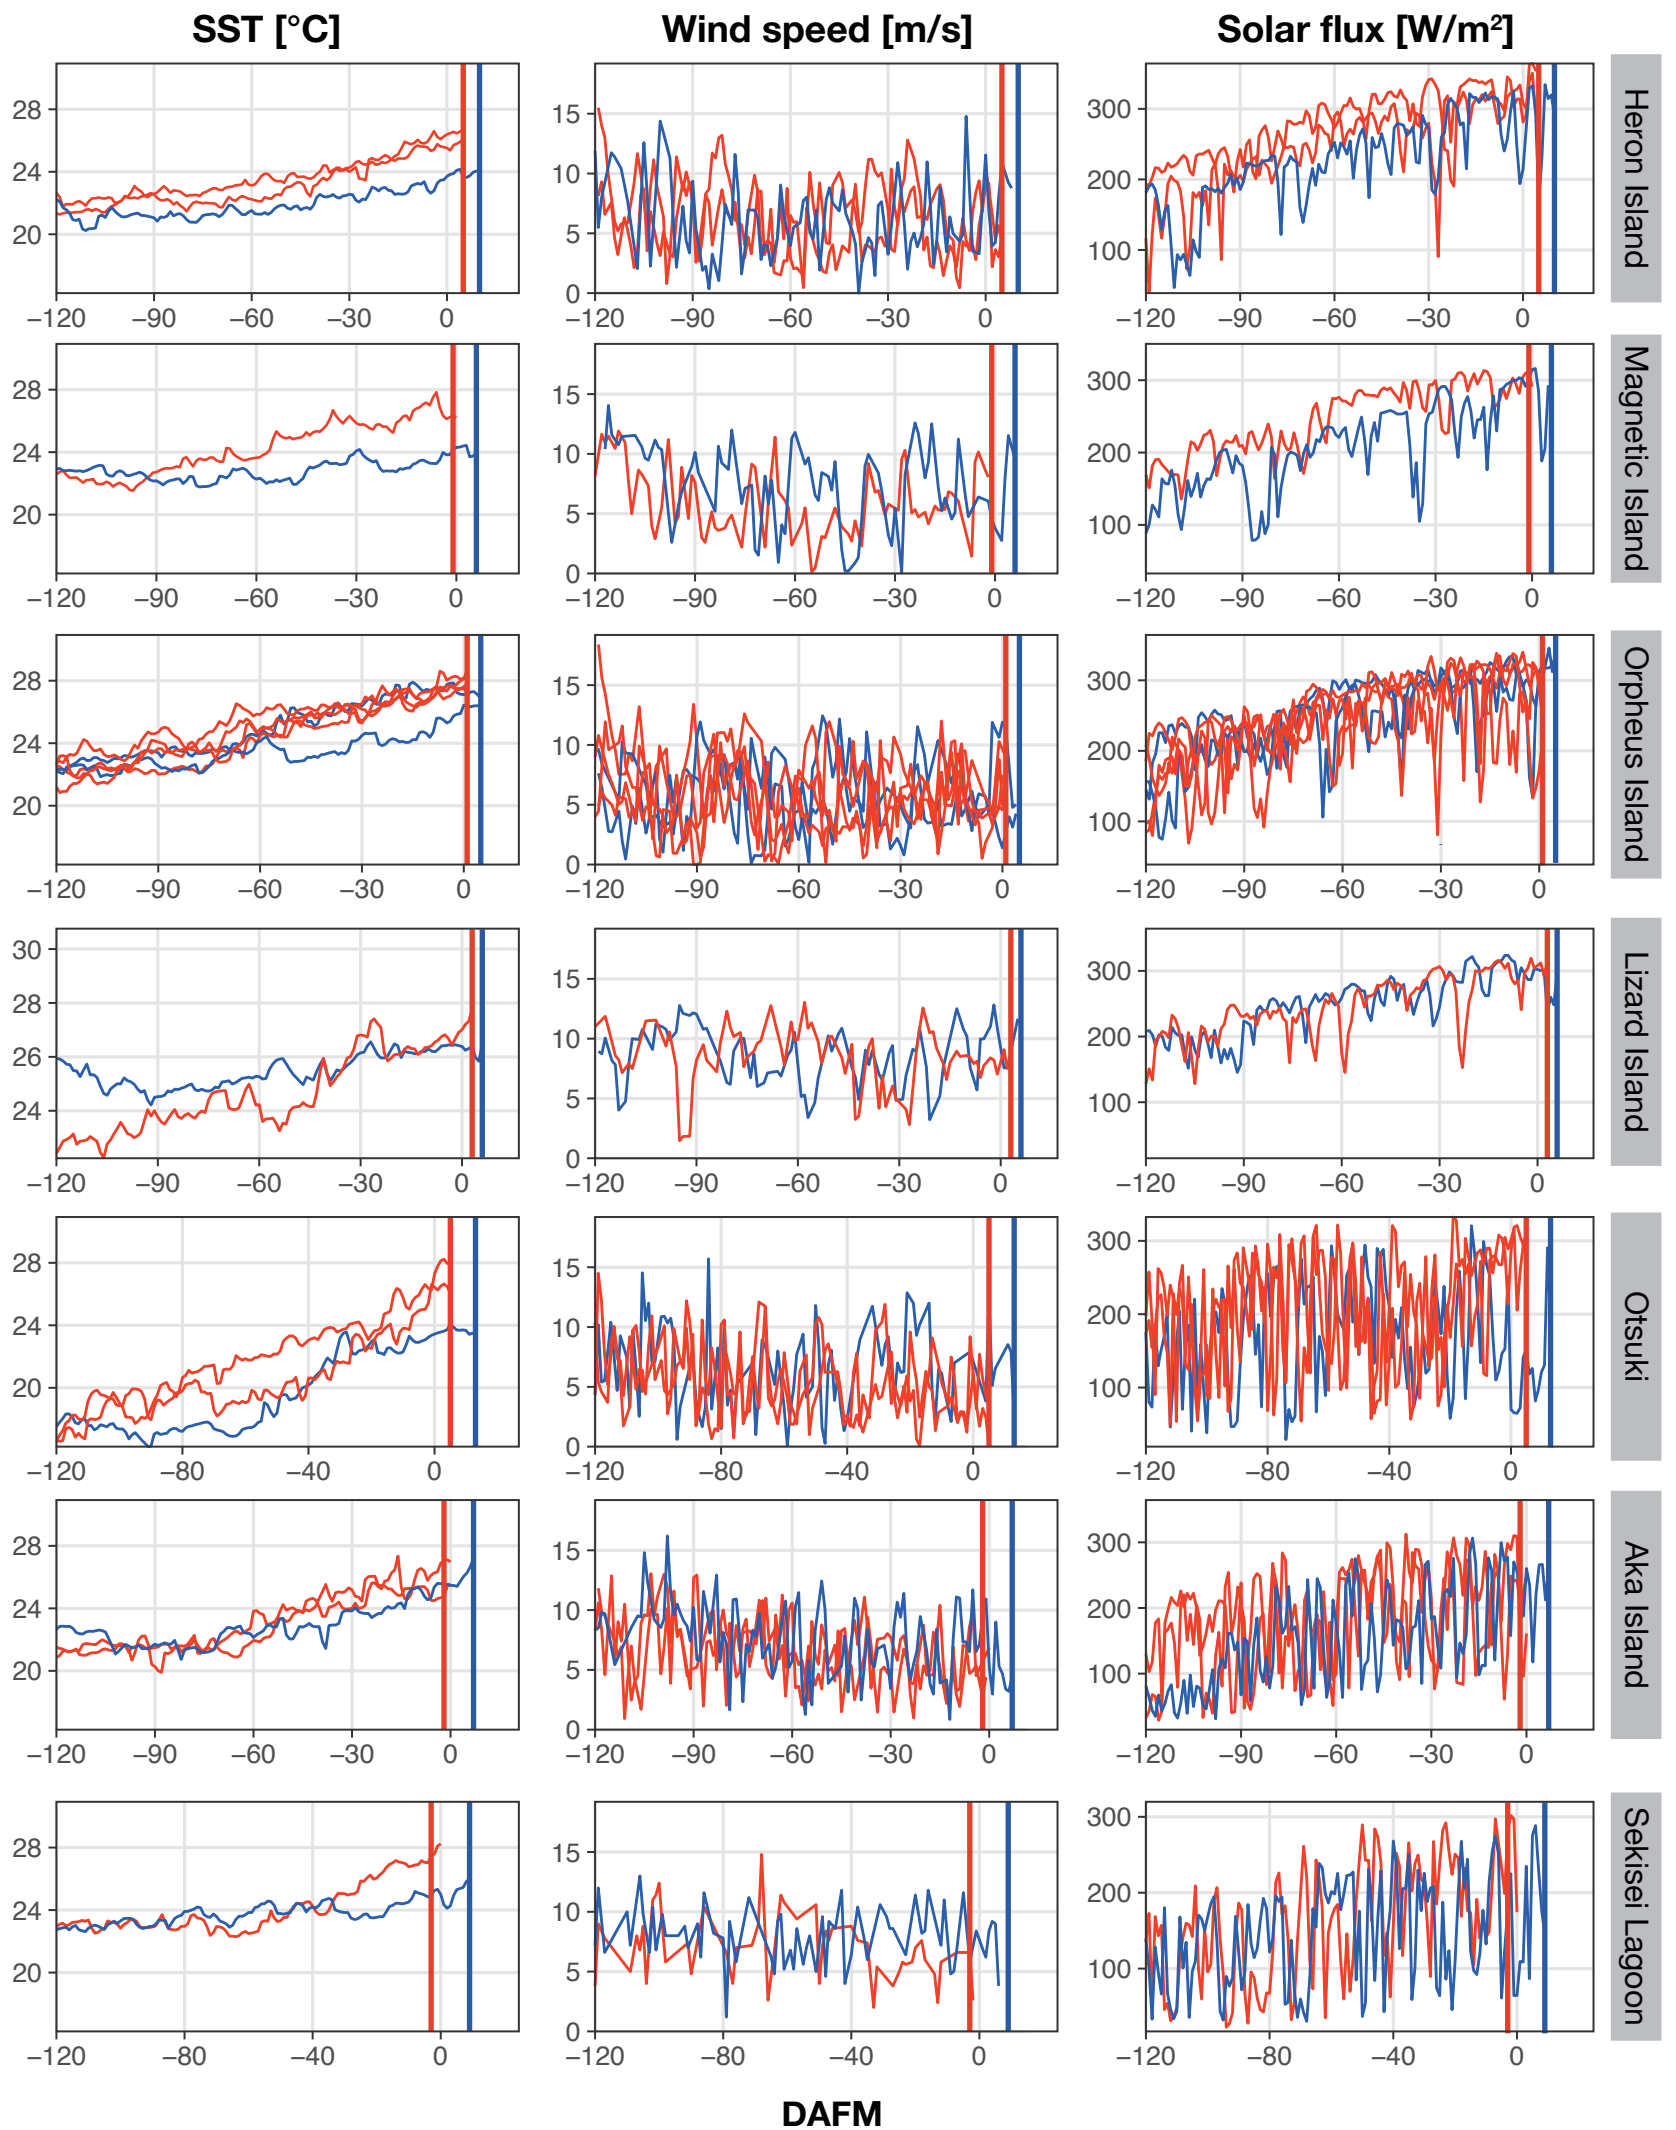

Figure S7



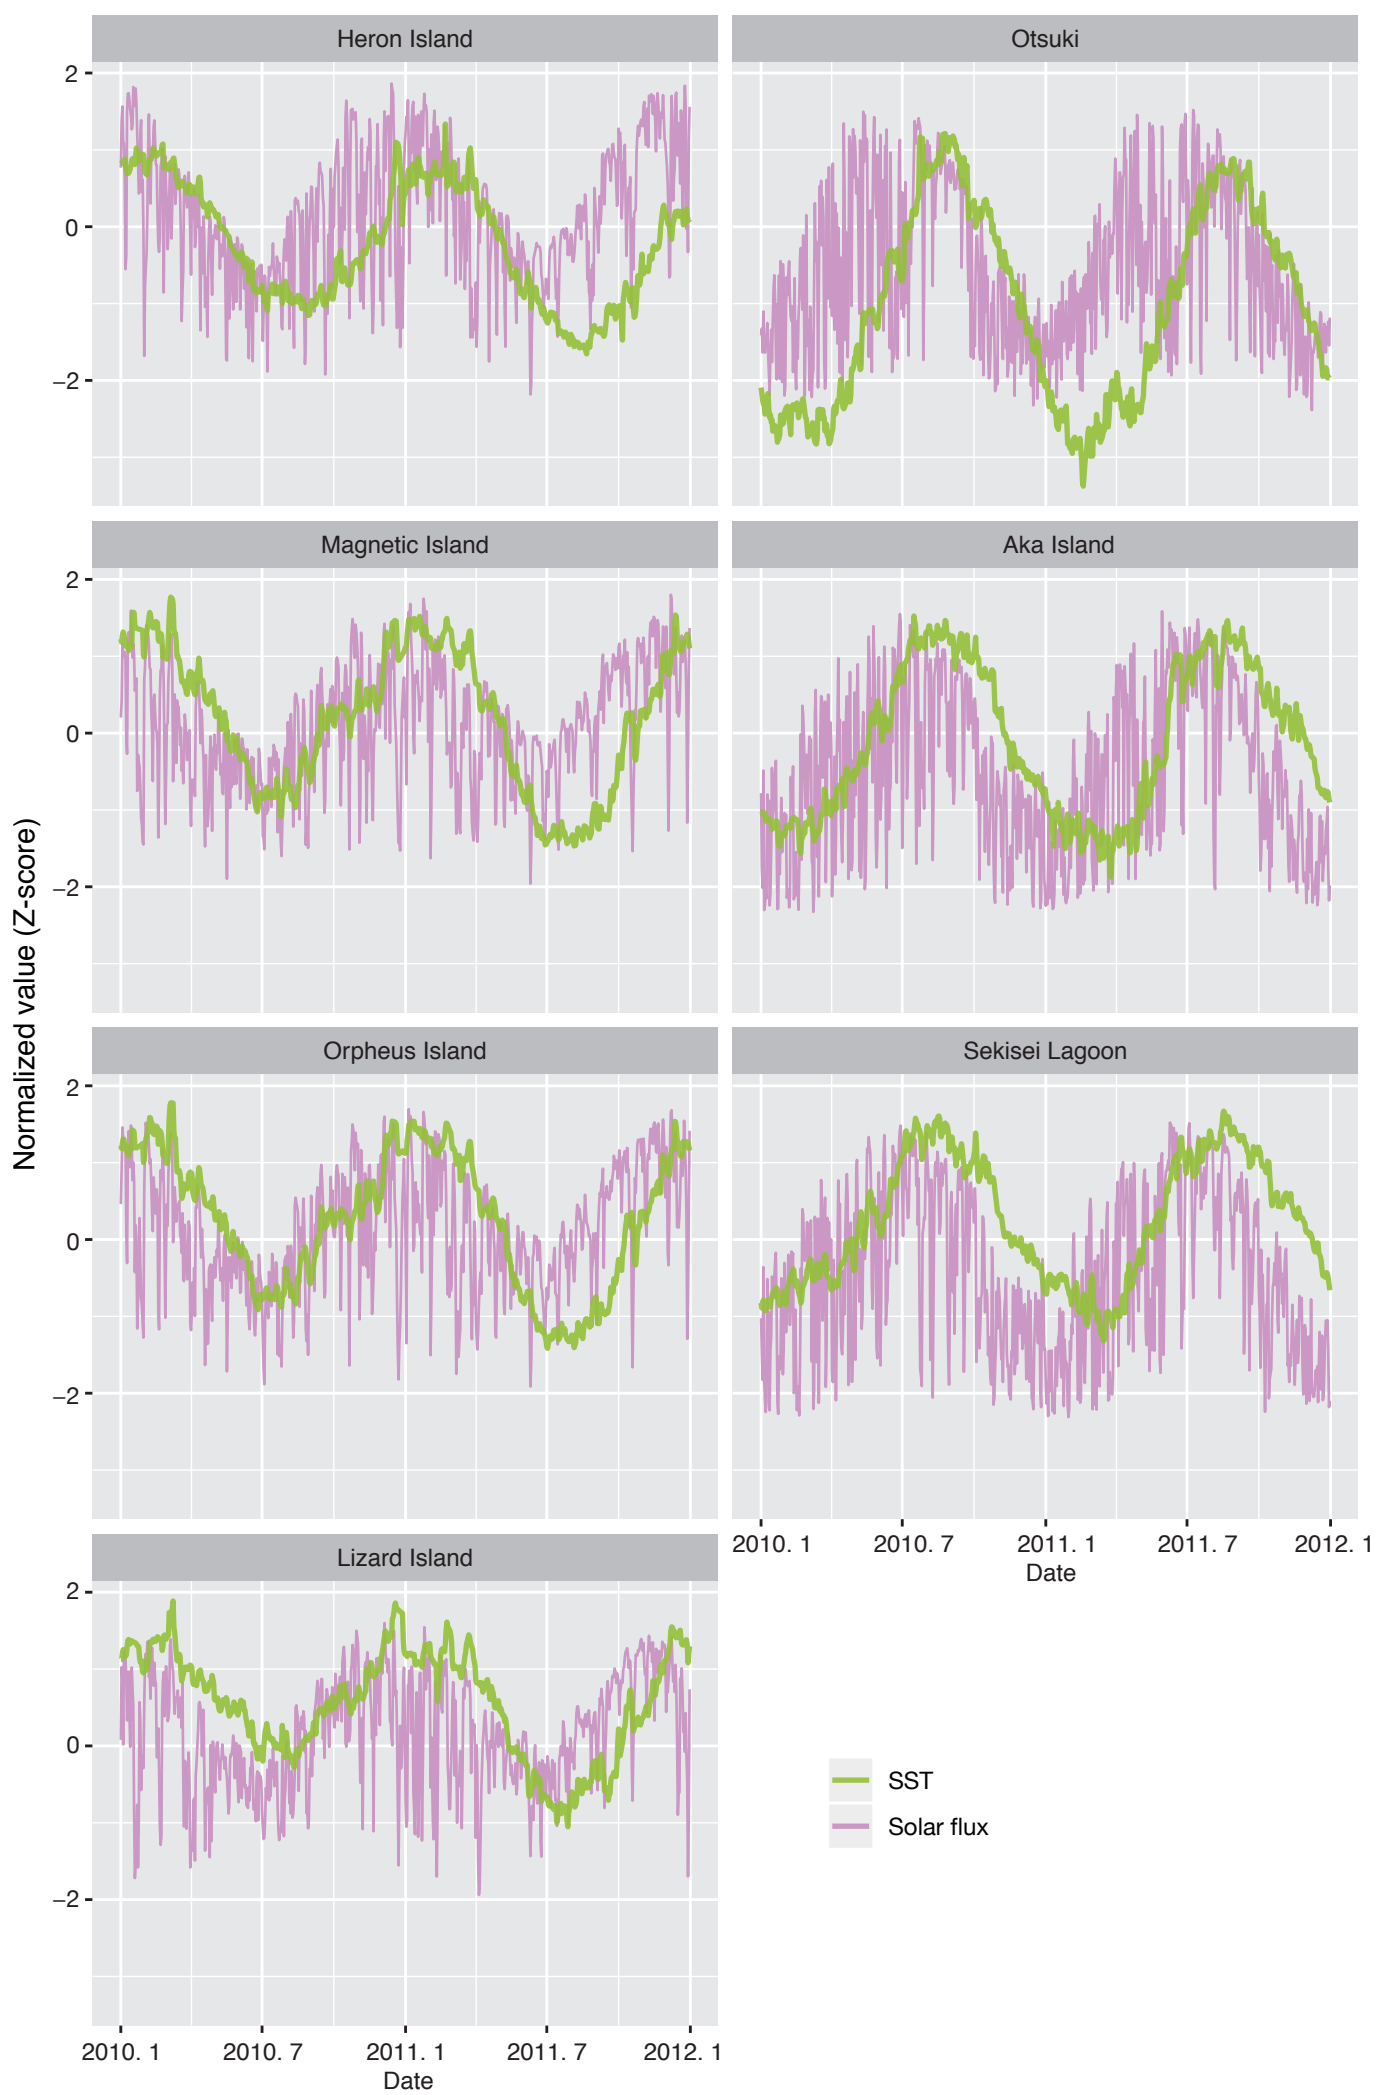

Figure S8
